# Supplementary material for: Biomarker Testing Disparities in Metastatic Colorectal Cancer
Source: PubMed Central journal article supplement (PMC11227072; doi:10.1001/jamanetworkopen.2024.19142), 2024-07-05
Supplement: jamanetwopen-e2419142-s001.pdf [file jamanetwopen-e2419142-s001.pdf]

## Supplemental Online Content

Sabbagh S, Herrán M, Hijazi A, et al. Biomarker testing disparities in metastatic colorectal cancer. *JAMA Netw Open*. 2024;7(7):e2419142. doi:10.1001/jamanetworkopen.2024.19142

**eAppendix.** Definition of Socioeconomic and Demographic Factors

**eFigure 1.** Kaplan Meier Overall Survival Curves Based on MSI Testing

**eFigure 2.** Kaplan Meier Overall Survival Curves Based on KRAS Testing

**eFigure 3.** Pattern of Biomarker Testing per Year of Diagnosis

**eTable 1.** US Census Division of the Regions by States

**eTable 2.** Univariable Association of Factors With MSI Testing

**eTable 3.** Univariable Association of Factors With KRAS Testing

**eReferences**

This supplemental material has been provided by the authors to give readers additional information about their work.

## **eAppendix. Definition of Socioeconomic and Demographic Factors**

Socioeconomic variables have been defined as factors of a social and economic nature, such as income, education, employment status, and insurance coverage, which collectively serve as indicators of an individual's standing within a community<sup>40</sup>. Demographic variables indicate the characteristics of a population, including age, ethnicity, race, and sex. The area of residence can potentially be classified as demographic, socioeconomic, or even geographic. Meanwhile, facility location and travel distance are considered geographic factors.

**eFigure 1. Kaplan Meier Overall Survival Curves Based on MSI Testing**

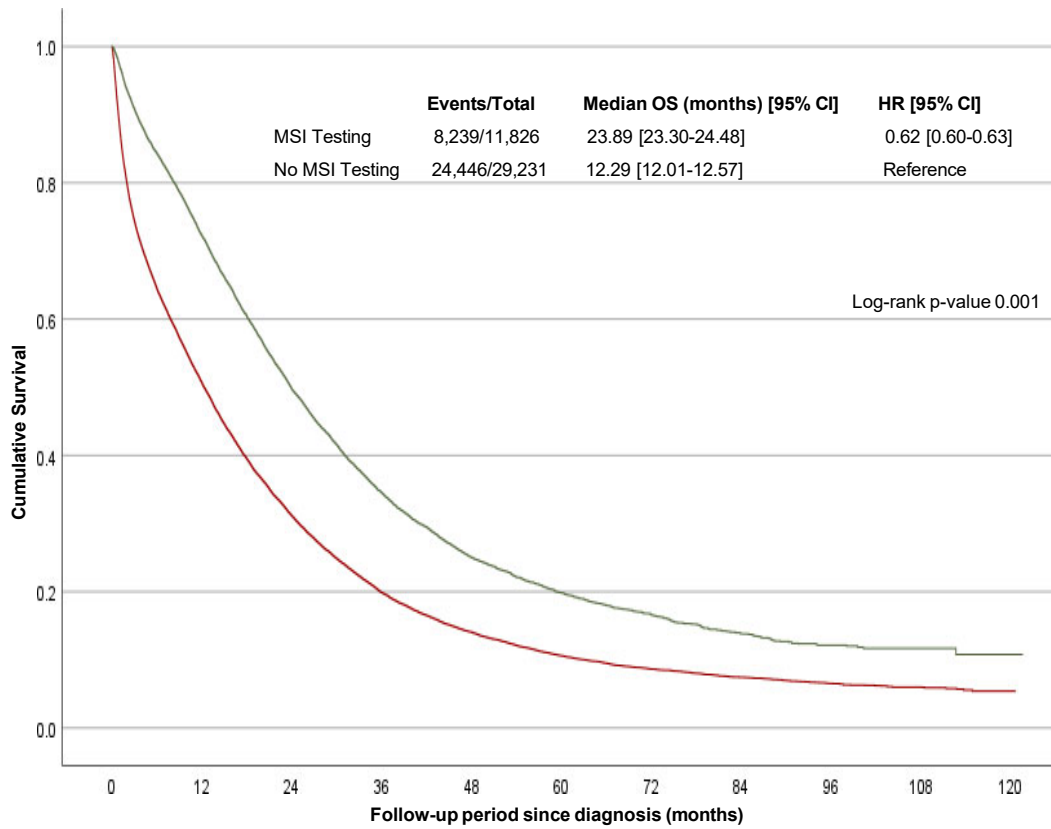

| No. at risk           | 0      | 12     | 24     | 36     | 48     | 60     | 72     | 84     | 96     | 108    | 120    |
|-----------------------|--------|--------|--------|--------|--------|--------|--------|--------|--------|--------|--------|
| <b>MSI Testing</b>    | 11,826 | 11,462 | 11,097 | 10,732 | 10,367 | 10,002 | 9,637  | 9,272  | 8,907  | 8,542  | 8,177  |
| <b>No MSI Testing</b> | 29,231 | 28,867 | 28,502 | 28,137 | 27,772 | 27,407 | 27,042 | 26,677 | 26,312 | 25,947 | 25,582 |

**eFigure 2. Kaplan Meier Overall Survival Curves Based on KRAS Testing**

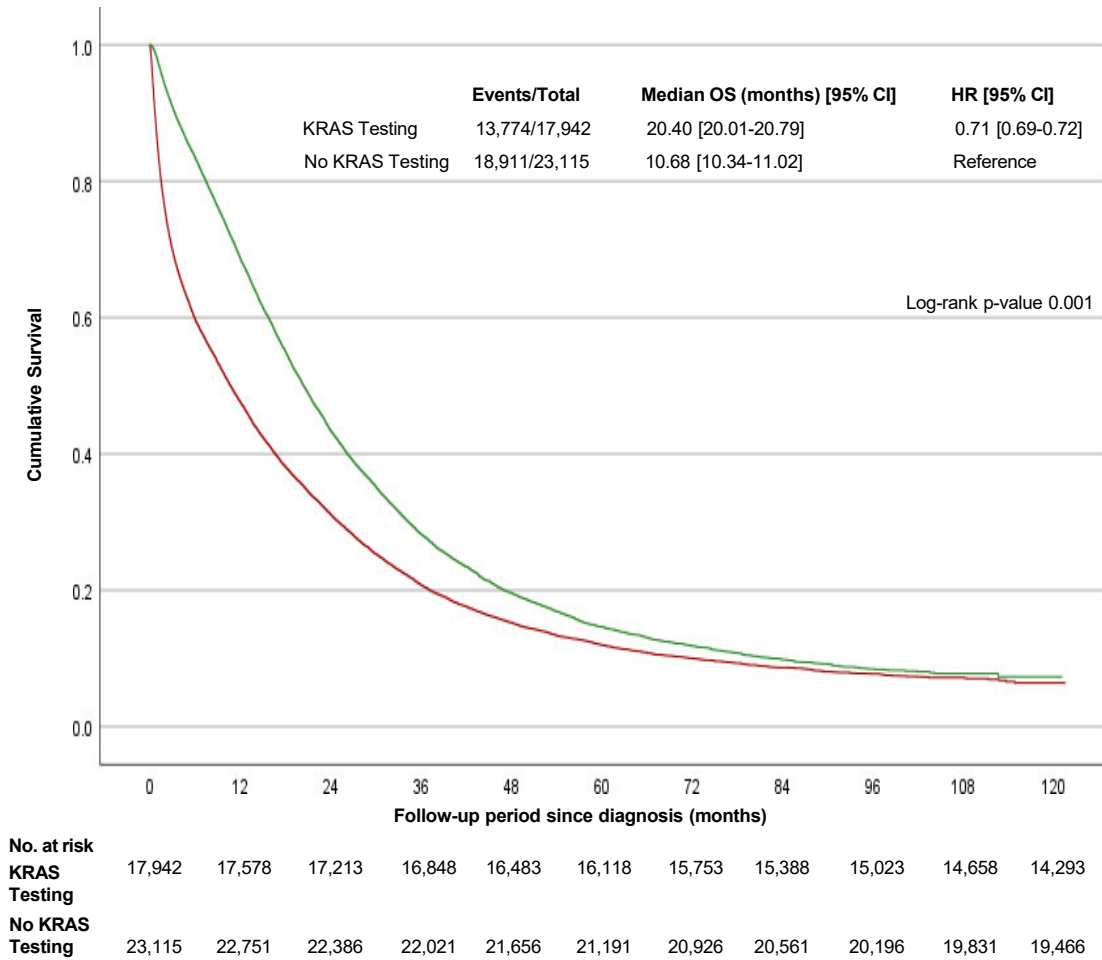

### eFigure 3. Pattern of Biomarker Testing Per Year of Diagnosis

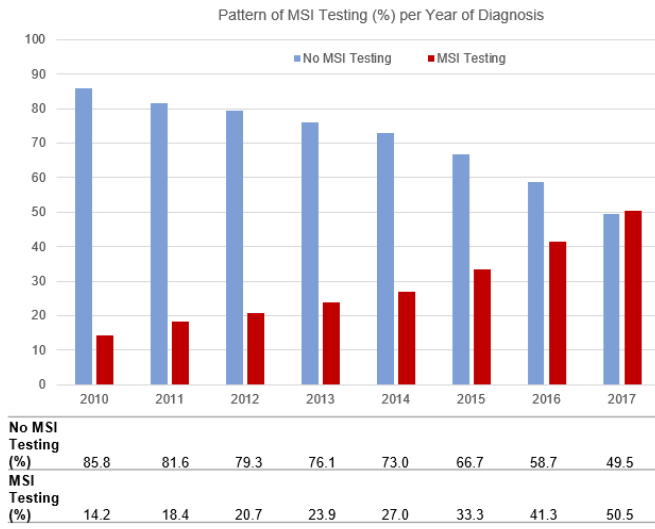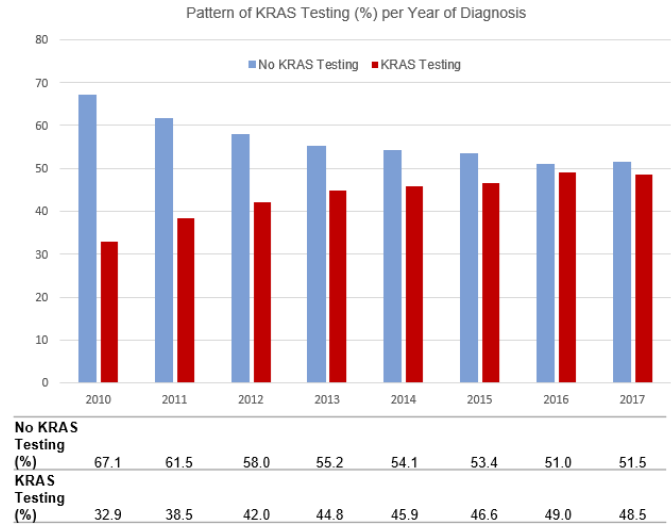

**eTable 1. US Census Division of the Regions by States**

| <b>REGION</b>             | <b>STATES INCLUDED</b>             |
|---------------------------|------------------------------------|
| <b>New England</b>        | CT, MA, ME, NH, RI, VT             |
| <b>Middle Atlantic</b>    | NJ, NY, PA                         |
| <b>South Atlantic</b>     | DC, DE, FL, GA, MD, NC, SC, VA, WV |
| <b>East North Central</b> | IL, IN, MI, OH, WI                 |
| <b>East South Central</b> | AL, KY, MS, TN                     |
| <b>West North Central</b> | IA, KS, MN, MO, ND, NE, SD         |
| <b>West South Central</b> | AR, LA, OK, TX                     |
| <b>Mountain</b>           | AZ, CO, ID, MT, NM, NV, UT, WY     |
| <b>Pacific</b>            | AK, CA, HI, OR, WA                 |

**eTable 2. Univariable Association of Factors with MSI Testing**

| Characteristics                    | Microsatellite Testing |               | p-value |
|------------------------------------|------------------------|---------------|---------|
|                                    | OR                     | 95% CI        |         |
| <b>Age, years</b>                  |                        |               |         |
| 18 - 49                            | 1 [Reference]          | –             | –       |
| 50 - 59                            | 0.64                   | (0.60 – 0.68) | <0.001  |
| 60 - 69                            | 0.48                   | (0.45 – 0.51) | <0.001  |
| 70 - 79                            | 0.37                   | (0.34 – 0.40) | <0.001  |
| <b>Race</b>                        |                        |               |         |
| White                              | 1 [Reference]          | –             | –       |
| Black                              | 0.82                   | (0.77 – 0.86) | <0.001  |
| Others <sup>a</sup>                | 1.18                   | (1.07 – 1.30) | 0.001   |
| <b>Ethnicity</b>                   |                        |               |         |
| Non-Hispanic                       | 1 [Reference]          | –             | –       |
| Hispanic <sup>b</sup>              | 1.03                   | (0.95 – 1.13) | 0.48    |
| <b>Sex</b>                         |                        |               |         |
| Male                               | 1 [Reference]          | –             | –       |
| Females                            | 1.07                   | (1.02 – 1.11) | 0.003   |
| <b>Insurance Status</b>            |                        |               |         |
| Private insurance                  | 1 [Reference]          | –             | –       |
| Uninsured                          | 0.56                   | (0.51 – 0.62) | <0.001  |
| Medicaid                           | 0.77                   | (0.72 – 0.83) | <0.001  |
| Medicare/Other                     | 0.56                   | (0.54 – 0.59) | <0.001  |
| Governmental                       |                        |               |         |
| Unknown                            | 0.52                   | (0.41 – 0.65) | <0.001  |
| <b>Education</b>                   |                        |               |         |
| <6.3%                              | 1 [Reference]          | –             | –       |
| 6.3%-10.8%                         | 0.84                   | (0.79 – 0.89) | <0.001  |
| 10.9%-17.5%                        | 0.67                   | (0.63 – 0.72) | <0.001  |
| ≥17.6%                             | 0.62                   | (0.59 – 0.67) | <0.001  |
| Unknown                            | 0.80                   | (0.64 – 1.00) | 0.06    |
| <b>Facility type</b>               |                        |               |         |
| Academic CP <sup>a</sup>           | 1 [Reference]          | –             | –       |
| Community CP <sup>a</sup>          | 0.58                   | (0.53 – 0.63) | <0.001  |
| Comprehensive CP <sup>a</sup>      | 0.74                   | (0.70 – 0.77) | <0.001  |
| Integrated network CP <sup>a</sup> | 1.03                   | (0.97 – 1.10) | 0.30    |
| <b>Area of Residence</b>           |                        |               |         |
| Metro                              | 1 [Reference]          | –             | –       |
| Urban                              | 0.87                   | (0.82 – 0.93) | <0.001  |
| Rural                              | 0.63                   | (0.52 – 0.76) | <0.001  |
| <b>Facility Location</b>           |                        |               |         |
| New England                        | 1 [Reference]          | –             | –       |
| Middle Atlantic                    | 0.71                   | (0.64 – 0.79) | <0.001  |
| South Atlantic                     | 0.66                   | (0.59 – 0.73) | <0.001  |
| East North Central                 | 0.66                   | (0.59 – 0.73) | <0.001  |
| East South Central                 | 0.58                   | (0.51 – 0.66) | <0.001  |

| Characteristics                   | Microsatellite Testing |               | p-value |
|-----------------------------------|------------------------|---------------|---------|
|                                   | OR                     | 95% CI        |         |
| West North Central                | 0.69                   | (0.61 – 0.78) | <0.001  |
| West South Central                | 0.58                   | (0.51 – 0.65) | <0.001  |
| Mountain                          | 0.88                   | (0.77 – 1.00) | 0.06    |
| Pacific                           | 0.87                   | (0.78 – 0.97) | 0.01    |
| <b>Travel distance</b>            |                        |               |         |
| ≤5 miles                          | 1 [Reference]          | –             | –       |
| 5.1-10                            | 1.16                   | (1.09 – 1.23) | <0.001  |
| 10.1-25                           | 1.22                   | (1.15 – 1.29) | <0.001  |
| >25 miles                         | 1.30                   | (1.23 – 1.38) | <0.001  |
| <b>Year of Diagnosis</b>          |                        |               |         |
| 2010                              | 1 [Reference]          | –             | –       |
| 2011                              | 1.37                   | (1.22 – 1.53) | <0.001  |
| 2012                              | 1.58                   | (1.42 – 1.76) | <0.001  |
| 2013                              | 1.90                   | (1.72 – 2.11) | <0.001  |
| 2014                              | 2.24                   | (2.02 – 2.48) | <0.001  |
| 2015                              | 3.02                   | (2.74 – 3.34) | <0.001  |
| 2016                              | 4.26                   | (3.85 – 4.70) | <0.001  |
| 2017                              | 6.17                   | (5.59 – 6.81) | <0.001  |
| <b>Median Household Income</b>    |                        |               |         |
| ≥\$63,333                         | 1 [Reference]          | –             | –       |
| \$50,354-\$63,332                 | 0.85                   | (0.8 – 0.9)   | <0.001  |
| \$40,227-\$50,353                 | 0.74                   | (0.7 – 0.78)  | <0.001  |
| <\$40,277                         | 0.64                   | (0.6 – 0.68)  | <0.001  |
| Unknown                           | 0.84                   | (0.68-1.04)   | 0.12    |
| <b>Charlson Comorbidity Index</b> |                        |               |         |
| 0                                 | 1 [Reference]          | –             | –       |
| 1                                 | 0.89                   | (0.84 – 0.94) | <0.001  |
| ≥2                                | 0.81                   | (0.74 – 0.87) | <0.001  |
| <b>Immunotherapy</b>              |                        |               |         |
| Not Administered                  | 1 [Reference]          | –             | –       |
| Administered                      | 2.79                   | (2.64 – 2.93) | <0.001  |
| Unknown                           | 1.45                   | (0.98 – 2.15) | 0.06    |
| <b>Chemotherapy</b>               |                        |               |         |
| Not administered                  | 1 [Reference]          | –             | –       |
| Administered                      | 2.78                   | (2.63 – 2.94) | <0.001  |
| Unknown                           | 1.72                   | (1.50 – 1.98) | <0.001  |
| <b>Surgery Primary Site</b>       |                        |               |         |
| No                                | 1 [Reference]          | –             | –       |
| Yes                               | 4.42                   | (4.22 – 4.63) | <0.001  |
| Unknown                           | 1.45                   | (0.79 – 2.66) | 0.24    |
| <b>Surgery Non-Primary Site</b>   |                        |               |         |
| No                                | 1 [Reference]          | –             | –       |
| Yes                               | 2.41                   | (2.28 – 2.53) | <0.001  |
| Unknown                           | 1.32                   | (0.67 – 2.60) | 0.43    |

CCI: Charlson Comorbidity Index, CP: Cancer Program

\*Other races include patients of American Indian/Aleutian/Eskimo, Asian Indian, Asian Indian/Pakistani, Chamorran, Chinese, Filipino, Fiji Islander, Guamanian, Hawaiian, Hmong, Japanese, Kampuchean, Korean, Laotian, Melanesian, Micronesian, New



Guinean, Other, Other Asian, Pacific Islander, Polynesian, Samoan, Tahitian, Thai, Tongan, Unknown origin, and Vietnamese.

<sup>b</sup>Hispanic ethnicity includes patients of Mexican, Puerto Rican, Cuban, South/Central American (except Brazil), Dominican Republic, or Spanish origin.

**eTable 3. Univariable Association of Factors with KRAS Testing**

| Characteristics                    | KRAS Testing  |               | p-value |
|------------------------------------|---------------|---------------|---------|
|                                    | OR            | 95% CI        |         |
| <b>Age, years</b>                  |               |               |         |
| 18 – 49                            | 1 [Reference] | –             | –       |
| 50 – 59                            | 0.74          | (0.70 – 0.80) | <0.001  |
| 60 – 69                            | 0.59          | (0.56 – 0.63) | <0.001  |
| 70 – 79                            | 0.41          | (0.38 – 0.44) | <0.001  |
| <b>Sex</b>                         |               |               |         |
| Male                               | 1 [Reference] | –             | –       |
| Females                            | 0.98          | (0.94 – 1.02) | 0.26    |
| <b>Education</b>                   |               |               |         |
| <6.3%                              | 1 [Reference] | –             | –       |
| 6.3%-10.8%                         | 1.05          | (0.86 – 1.29) | 0.62    |
| 10.9%-17.5%                        | 0.93          | (0.76 – 1.14) | 0.46    |
| ≥17.6%                             | 0.77          | (0.63 – 0.95) | 0.01    |
| Unknown                            | 0.73          | (0.60 – 0.90) | 0.003   |
| <b>Insurance status</b>            |               |               |         |
| Private insurance                  | 1 [Reference] | –             | –       |
| Not insurance                      | 0.63          | (0.58 – 0.69) | <0.001  |
| Medicaid                           | 0.73          | (0.68 – 0.78) | <0.001  |
| Medicare/Other                     | 0.57          | (0.55 – 0.60) | <0.001  |
| Governmental                       |               |               |         |
| Unknown                            | 0.60          | (0.50 – 0.72) | <0.001  |
| <b>Facility type</b>               |               |               |         |
| Academic CP <sup>a</sup>           | 1 [Reference] | –             | –       |
| Community CP <sup>a</sup>          | 1.02          | (1.02 – 1.14) | 0.007   |
| Comprehensive CP <sup>a</sup>      | 0.81          | (0.75 – 0.88) | <0.001  |
| Integrated network CP <sup>a</sup> | 0.92          | (0.87 – 0.97) | 0.002   |
| <b>Area of Residence</b>           |               |               |         |
| Metro                              | 1 [Reference] | –             | –       |
| Urban                              | 0.91          | (0.86 – 0.96) | <0.001  |
| Rural                              | 0.93          | (0.79 – 1.09) | 0.34    |
| <b>Facility Location</b>           |               |               |         |
| New England                        | 1 [Reference] | –             | –       |
| Middle Atlantic                    | 0.85          | (0.77 – 0.94) | 0.002   |
| South Atlantic                     | 0.80          | (0.73 – 0.88) | <0.001  |
| East North Central                 | 0.78          | (0.70 – 0.86) | <0.001  |
| East South Central                 | 0.64          | (0.56 – 0.72) | <0.001  |
| West North Central                 | 1.00          | (0.89 – 1.12) | 0.99    |
| West South Central                 | 0.72          | (0.64 – 0.80) | <0.001  |
| Mountain                           | 0.95          | (0.83 – 1.07) | 0.40    |
| Pacific                            | 0.92          | (0.83 – 1.02) | 0.13    |
| <b>Travel distance</b>             |               |               |         |
| ≤5 miles                           | 1 [Reference] | –             | –       |
| 5.1-10                             | 1.12          | (1.06 – 1.18) | <0.001  |
| 10.1-25                            | 1.16          | (1.11 – 1.23) | <0.001  |
| >25 miles                          | 1.15          | (1.09 – 1.21) | <0.001  |
| <b>Year of Diagnosis</b>           |               |               |         |
| 2010                               | 1 [Reference] | –             | –       |
| 2011                               | 1.30          | (1.18 – 1.39) | <0.001  |
| 2012                               | 1.47          | (1.36 – 1.60) | <0.001  |
| 2013                               | 1.66          | (1.53 – 1.79) | <0.001  |
| 2014                               | 1.73          | (1.59 – 1.87) | <0.001  |
| 2015                               | 1.78          | (1.64 – 1.93) | <0.001  |

| Characteristics                   | KRAS Testing  |               | p-value |
|-----------------------------------|---------------|---------------|---------|
|                                   | OR            | 95% CI        |         |
| 2016                              | 1.96          | (1.80 – 2.12) | <0.001  |
| 2017                              | 1.92          | (1.77 – 2.08) | <0.001  |
| <b>Median Household Income</b>    |               |               |         |
| ≥\$63,333                         | 1 [Reference] | –             | –       |
| \$50,354-\$63,332                 | 0.90          | (0.85 – 0.95) | <0.001  |
| \$40,227-\$50,353                 | 0.81          | (0.77 – 0.85) | <0.001  |
| <\$40,277                         | 0.72          | (0.68 – 0.76) | <0.001  |
| Unknown                           | 1             | (0.82 – 1.21) | 0.96    |
| <b>Charlson Comorbidity Index</b> |               |               |         |
| 0                                 | 1 [Reference] | –             | –       |
| 1                                 | 0.90          | (0.86 – 0.95) | <0.001  |
| ≥2                                | 0.64          | (0.60 – 0.69) | <0.001  |
| <b>Immunotherapy</b>              |               |               |         |
| Not Administered                  | 1 [Reference] | –             | –       |
| Administered                      | 2.93          | (2.78 – 3.09) | <0.001  |
| Unknown                           | 1.29          | (0.89 – 1.87) | 0.17    |
| <b>Chemotherapy</b>               |               |               |         |
| Not administered                  | 1 [Reference] | –             | –       |
| Administered                      | 5.06          | (4.80 – 5.33) | <0.001  |
| Unknown                           | 2.07          | (1.82 – 2.36) | <0.001  |
| <b>Surgery Primary Site</b>       |               |               |         |
| No                                | 1 [Reference] | –             | –       |
| Yes                               | 1.88          | (1.81 – 1.96) | <0.001  |
| Unknown                           | 0.74          | (0.43 – 1.27) | 0.27    |
| <b>Surgery Non-Primary Site</b>   |               |               |         |
| No                                | 1 [Reference] | –             | –       |
| Yes                               | 1.65          | (1.57 – 1.73) | <0.001  |
| Unknown                           | 1.65          | (0.88 – 3.10) | 0.12    |
| <b>Race</b>                       |               |               |         |
| White                             | 1 [Reference] | –             | –       |
| Black                             | 0.89          | (0.85 – 0.94) | <0.001  |
| Others <sup>a</sup>               | 1.03          | (0.93 – 1.12) | 0.60    |
| <b>Ethnicity</b>                  |               |               |         |
| Non-Hispanic                      | 1 [Reference] | –             | –       |
| Hispanic <sup>b</sup>             | 0.99          | (0.91 – 1.07) | 0.75    |

CCI: Charlson Comorbidity Index, CP: Cancer Program

<sup>a</sup>Other races include patients of American Indian/Aleutian/Eskimo, Asian Indian, Asian Indian/Pakistani, Chamorran, Chinese, Filipino, Fiji Islander, Guamanian, Hawaiian, Hmong, Japanese, Kampuchean, Korean, Laotian, Melanesian, Micronesian, New Guinean, Other, Other Asian, Pacific Islander, Polynesian, Samoan, Tahitian, Thai, Tongan, Unknown origin, and Vietnamese.

<sup>b</sup>Hispanic ethnicity includes patients of Mexican, Puerto Rican, Cuban, South/Central American (except Brazil), Dominican Republic, or Spanish origin.

## eReferences:

1. Siegel RL, Wagle NS, Cercek A, Smith RA, Jemal A. Colorectal cancer statistics, 2023. *CA Cancer J Clin*. May-Jun 2023;73(3):233-254. doi:10.3322/caac.21772
2. Institute NC. Cancer Stat Facts: Colorectal Cancer. Accessed October 19th 2023. <https://seer.cancer.gov/statfacts/html/colorect.html>
3. Hong DS, Fakih MG, Strickler JH, et al. KRAS(G12C) Inhibition with Sotorasib in Advanced Solid Tumors. *N Engl J Med*. Sep 24 2020;383(13):1207-1217. doi:10.1056/NEJMoa1917239
4. Di Nicolantonio F, Vitiello PP, Marsoni S, et al. Precision oncology in metastatic colorectal cancer - from biology to medicine. *Nat Rev Clin Oncol*. Aug 2021;18(8):506-525. doi:10.1038/s41571-021-00495-z
5. Han CB, Li F, Ma JT, Zou HW. Concordant KRAS mutations in primary and metastatic colorectal cancer tissue specimens: a meta-analysis and systematic review. *Cancer Invest*. Dec 2012;30(10):741-7. doi:10.3109/07357907.2012.732159
6. Douillard JY, Siena S, Cassidy J, et al. Randomized, phase III trial of panitumumab with infusional fluorouracil, leucovorin, and oxaliplatin (FOLFOX4) versus FOLFOX4 alone as first-line treatment in patients with previously untreated metastatic colorectal cancer: the PRIME study. *J Clin Oncol*. Nov 1 2010;28(31):4697-705. doi:10.1200/jco.2009.27.4860
7. Moreira L, Balaguer F, Lindor N, et al. Identification of Lynch syndrome among patients with colorectal cancer. *Jama*. Oct 17 2012;308(15):1555-65. doi:10.1001/jama.2012.13088
8. André T, Shiu KK, Kim TW, et al. Pembrolizumab in Microsatellite-Instability-High Advanced Colorectal Cancer. *N Engl J Med*. Dec 3 2020;383(23):2207-2218. doi:10.1056/NEJMoa2017699
9. Overman MJ, McDermott R, Leach JL, et al. Nivolumab in patients with metastatic DNA mismatch repair-deficient or microsatellite instability-high colorectal cancer (CheckMate 142): an open-label, multicentre, phase 2 study. *Lancet Oncol*. Sep 2017;18(9):1182-1191. doi:10.1016/s1470-2045(17)30422-9
10. Benson AB, Venook AP, Al-Hawary MM, et al. Colon Cancer, Version 2.2021, NCCN Clinical Practice Guidelines in Oncology. *J Natl Compr Canc Netw*. Mar 2 2021;19(3):329-359. doi:10.6004/jnccn.2021.0012
11. Warren Andersen S, Blot WJ, Lipworth L, Steinwandel M, Murff HJ, Zheng W. Association of Race and Socioeconomic Status With Colorectal Cancer Screening, Colorectal Cancer Risk, and Mortality in Southern US Adults. *JAMA Network Open*. 2019;2(12):e1917995-e1917995. doi:10.1001/jamanetworkopen.2019.17995
12. Ramkumar N, Colla CH, Wang Q, O'Malley AJ, Wong SL, Brooks GA. Association of Ruralness, Race and Ethnicity, and Socioeconomic Status With the Surgical Management of Colon Cancer and Postoperative Outcomes Among Medicare Beneficiaries. *JAMA Network Open*. 2022;5(8):e2229247-e2229247. doi:10.1001/jamanetworkopen.2022.29247
13. Augustus GJ, Ellis NA. Colorectal Cancer Disparity in African Americans: Risk Factors and Carcinogenic Mechanisms. *Am J Pathol*. Feb 2018;188(2):291-303. doi:10.1016/j.ajpath.2017.07.023
14. Fulton JE. Physical Inactivity is More Common among Racial and Ethnic Minorities in Most States | Blogs | CDC. Centers for Disease Control and Prevention. Accessed 10/19/2023, 2023. <https://blogs.cdc.gov/healthequity/2020/04/01/physical-inactivity/>
15. Gawron AJ, Yadlapati R. Disparities in Endoscopy Use for Colorectal Cancer Screening in the United States. *Digestive Diseases and Sciences*. 2014/03/01 2014;59(3):530-537. doi:10.1007/s10620-013-2937-x
16. May FP, Yang L, Corona E, Glenn BA, Bastani R. Disparities in Colorectal Cancer Screening in the United States Before and After Implementation of the Affordable Care Act. *Clin Gastroenterol Hepatol*. Jul 2020;18(8):1796-1804.e2. doi:10.1016/j.cgh.2019.09.008
17. Edwards BK, Ward E, Kohler BA, et al. Annual report to the nation on the status of cancer, 1975-

- 2006, featuring colorectal cancer trends and impact of interventions (risk factors, screening, and treatment) to reduce future rates. *Cancer*. Feb 1 2010;116(3):544-73. doi:10.1002/cncr.24760
18. Tramontano AC, Chen Y, Watson TR, Eckel A, Hur C, Kong CY. Racial/ethnic disparities in colorectal cancer treatment utilization and phase-specific costs, 2000-2014. *PLOS ONE*. 2020;15(4):e0231599. doi:10.1371/journal.pone.0231599
  19. Bakkila BF, Kerekes D, Nunez-Smith M, et al. Evaluation of Racial Disparities in Quality of Care for Patients With Gastrointestinal Tract Cancer Treated With Surgery. *JAMA Network Open*. 2022;5(4):e225664-e225664. doi:10.1001/jamanetworkopen.2022.5664
  20. Dharwadkar P, Greenan G, Stoffel EM, et al. Racial and Ethnic Disparities in Germline Genetic Testing of Patients With Young-Onset Colorectal Cancer. *Clin Gastroenterol Hepatol*. Feb 2022;20(2):353-361.e3. doi:10.1016/j.cgh.2020.12.025
  21. Dillon J, Ademuyiwa FO, Barrett M, et al. Disparities in Genetic Testing for Heritable Solid-Tumor Malignancies. *Surg Oncol Clin N Am*. Jan 2022;31(1):109-126. doi:10.1016/j.soc.2021.08.004
  22. Bilimoria KY, Stewart AK, Winchester DP, Ko CY. The National Cancer Data Base: a powerful initiative to improve cancer care in the United States. *Ann Surg Oncol*. Mar 2008;15(3):683-90. doi:10.1245/s10434-007-9747-3
  23. Boehmer L, Roy UKB, Schrag J, et al. Identifying barriers to equitable biomarker testing in underserved patients with NSCLC: A mixed-methods study to inform quality improvement opportunities. *Journal of Clinical Oncology*. 2021;39(28\_suppl):123-123. doi:10.1200/JCO.2020.39.28\_suppl.123
  24. *Assessing the Status of Biomarker Testing in Metastatic Colorectal Cancer and the Challenges Faced by Community Cancer Care Teams*. 2021. February 2021. Accessed March 20, 2024. [https://www.accc-cancer.org/docs/projects/colorectal-cancer-biomarker/mcrc\\_survey-summary\\_final-\(1\).pdf?sfvrsn=20c6687\\_0](https://www.accc-cancer.org/docs/projects/colorectal-cancer-biomarker/mcrc_survey-summary_final-(1).pdf?sfvrsn=20c6687_0)
  25. Petrelli NJ. A community cancer center program: getting to the next level. *J Am Coll Surg*. Mar 2010;210(3):261-70. doi:10.1016/j.jamcollsurg.2009.11.015
  26. Blee SM, Shah RP, Pinheiro APM, et al. Physician Communication and Patient Understanding of Molecular Testing Terminology. *The Oncologist*. 2021;26(11):934-940. doi:10.1002/onco.13930
  27. Census Bureau Data. U.S. Census Bureau. Accessed March 2024, 2024. <https://data.census.gov/>
  28. Educational Attainment by State. World Population Review. Accessed 10/19/2023, 2023. <https://worldpopulationreview.com/state-rankings/educational-attainment-by-state>
  29. Group. USCSW. U.S. Cancer Statistics Data Visualizations Tool. U.S. Department of Health and Human Services, Centers for Disease Control and Prevention and National Cancer Institute. Accessed March 2024, 2024. <https://www.cdc.gov/cancer/dataviz>
  30. Umar A, Boland CR, Terdiman JP, et al. Revised Bethesda Guidelines for hereditary nonpolyposis colorectal cancer (Lynch syndrome) and microsatellite instability. *J Natl Cancer Inst*. Feb 18 2004;96(4):261-8. doi:10.1093/jnci/djh034
  31. Administration USF, Drug. FDA grants accelerated approval to pembrolizumab for first tissue/site agnostic indication | FDA. Accessed 12-22, 2023. <https://www.fda.gov/drugs/resources-information-approved-drugs/fda-grants-accelerated-approval-pembrolizumab-first-tissuesite-agnostic-indication>
  32. Aro AR, Hakonen A, Hietala M, et al. Acceptance of genetic testing in a general population: age, education and gender differences. *Patient Educ Couns*. Sep-Oct 1997;32(1-2):41-9. doi:10.1016/s0738-3991(97)00061-x
  33. Sadigh G, Goeckner HG, Kazerooni EA, et al. State legislative trends related to biomarker testing. *Cancer*. Aug 1 2022;128(15):2865-2870. doi:10.1002/cncr.34271
  34. Bruno DS, Hess LM, Li X, Su EW, Patel M. Disparities in Biomarker Testing and Clinical Trial Enrollment Among Patients With Lung, Breast, or Colorectal Cancers in the United States. *JCO Precis Oncol*. Jun 2022;6:e2100427. doi:10.1200/po.21.00427
  35. Lenz HJ, Van Cutsem E, Luisa Limon M, et al. First-Line Nivolumab Plus Low-Dose Ipilimumab for

Microsatellite Instability-High/Mismatch Repair-Deficient Metastatic Colorectal Cancer: The Phase II CheckMate 142 Study. *J Clin Oncol*. Jan 10 2022;40(2):161-170. doi:10.1200/jco.21.01015

36. André T, Shiu K-K, Kim TW, et al. Pembrolizumab in Microsatellite-Instability–High Advanced Colorectal Cancer. *New England Journal of Medicine*. 2020;383(23):2207-2218. doi:10.1056/NEJMoa2017699

37. Zocche DM, Ramirez C, Fontao FM, Costa LD, Redal MA. Global impact of KRAS mutation patterns in FOLFOX treated metastatic colorectal cancer. *Front Genet*. 2015;6:116. doi:10.3389/fgene.2015.00116

38. Loupakis F, Ruzzo A, Cremolini C, et al. KRAS codon 61, 146 and BRAF mutations predict resistance to cetuximab plus irinotecan in KRAS codon 12 and 13 wild-type metastatic colorectal cancer. *Br J Cancer*. Aug 18 2009;101(4):715-21. doi:10.1038/sj.bjc.6605177

39. Van Cutsem E, Köhne CH, Hitre E, et al. Cetuximab and chemotherapy as initial treatment for metastatic colorectal cancer. *N Engl J Med*. Apr 2 2009;360(14):1408-17. doi:10.1056/NEJMoa0805019

40. Centers for Disease Control and Prevention (CDC). Socioeconomic factors. Accessed 12-22, 2023 [https://www.cdc.gov/dhdsp/health\\_equity/socioeconomic.htm](https://www.cdc.gov/dhdsp/health_equity/socioeconomic.htm)
