# Supplementary material for: Biomarker Testing Disparities in Metastatic Colorectal Cancer
Source: PubMed Central journal article supplement (PMC11227072; doi:10.1001/jamanetworkopen.2024.19142), 2024-07-05
Supplement: jamanetwopen-e2419142-s002.pdf [file jamanetwopen-e2419142-s002.pdf]

## Data Sharing Statement

Sabbagh. Biomarker Testing Disparities in Metastatic Colorectal Cancer. *JAMA Netw Open*. Published July 05, 2024. doi:10.1001/jamanetworkopen.2024.19142

### Data

**Data available:** Yes

**Data types:** Data dictionary, Deidentified participant data

**How to access data:** Data source: National Cancer Database was obtained through an application submitted by the principal investigator and coauthors. The link for the website application portal is <https://www.facs.org/quality-programs/cancer-programs/national-cancer-database/puf/> Data Dictionary: Publically Available <https://www.facs.org/media/brilfbgu/puf-2020-data-dictionary.pdf>

**When available:** With publication

### Supporting Documents

**Document types:** None

### Additional Information

**Who can access the data:** Researchers whose proposed use of the data has been approved.

**Types of analyses:** For purposes related to statistical method credibility.

**Mechanisms of data availability:** After approval of the application submitted through the NCDB website.
